# Supplementary material
Source: PubMed Central journal article supplement (PMC4974339)

| UPJO GSTM1 Sample 315 Western Densitometry of Monomer |           |               |                  | UPJO GSTM1 Sample 315 Western Densitometry of Dimer |           |               |                  | UPJO GSTM1 Sample 315 Comb. Dens Results |           |               |               |
|-------------------------------------------------------|-----------|---------------|------------------|-----------------------------------------------------|-----------|---------------|------------------|------------------------------------------|-----------|---------------|---------------|
| Sample                                                | Peak Area | Percent Total | Relative Density | Sample                                              | Peak Area | Percent Total | Relative Density | Sample                                   | Peak Area | Percent Total | Relative Dens |
| CTRL106                                               | 12548.53  | 86.895        | 1                | CTRL106                                             | 923.406   | 5.772         | 1                | CTRL1062                                 | 13471.936 | 44.39%        | 1.00          |
| K315                                                  | 1878.376  | 13.007        | 0.149686403      | K315                                                | 14999.501 | 93.762        | 16.24428274      | K315                                     | 16877.877 | 55.61%        | 1.25          |

| UPJO GSTM1 Sample 259 Western Densitometry of Monomer |           |               |                  | UPJO GSTM1 Sample 259 Western Densitometry of Dimer |           |               |                  | UPJO GSTM1 Sample 259 Comb. Dens Results |           |               |               |
|-------------------------------------------------------|-----------|---------------|------------------|-----------------------------------------------------|-----------|---------------|------------------|------------------------------------------|-----------|---------------|---------------|
| Sample                                                | Peak Area | Percent Total | Relative Density | Sample                                              | Peak Area | Percent Total | Relative Density | Sample                                   | Peak Area | Percent Total | Relative Dens |
| CTRL888                                               | 122.657   | 0.523         | 1                | CTRL888                                             | 76.536    | 1.535         | 1                | CTRL888                                  | 199.193   | 0.74%         | 1.00          |
| K259                                                  | 22809.794 | 97.172        | 185.7973231      | K259                                                | 3740.589  | 75.024        | 48.87557003      | K259                                     | 26550.383 | 99.26%        | 133.29        |

(graphed at 8-fold)

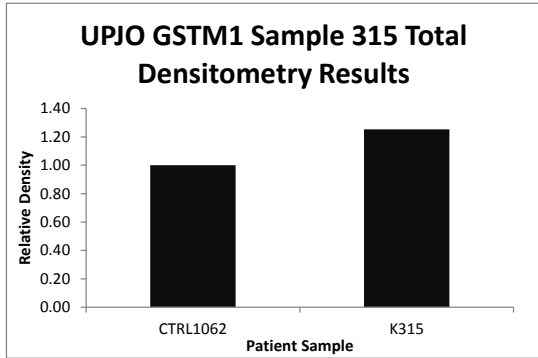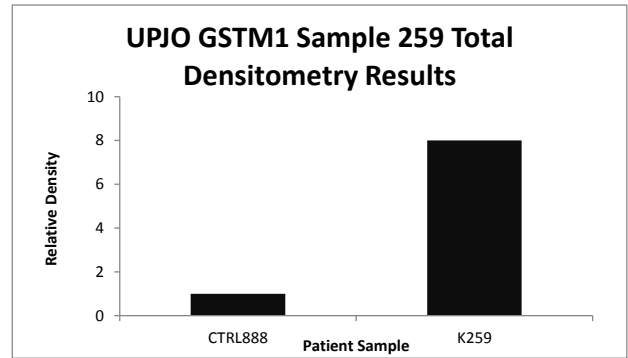

| UPJO HSP70 Sample 1 Western Densitometry |           |               |                  |
|------------------------------------------|-----------|---------------|------------------|
| Sample                                   | Peak Area | Percent Total | Relative Density |
| B1218                                    | 9458.681  | 21.43         | 0.246619483      |
| K1                                       | 21940.945 | 49.71         | 0.572069739      |

| UPJO HSP70 Sample 315 Western Densitometry |           |               |                  |
|--------------------------------------------|-----------|---------------|------------------|
| Sample                                     | Peak Area | Percent Total | Relative Density |
| CTRL1062                                   | 15314.338 | 29.139        | 29.139           |
| K315                                       | 29471.116 | 56.075        | 56.075           |

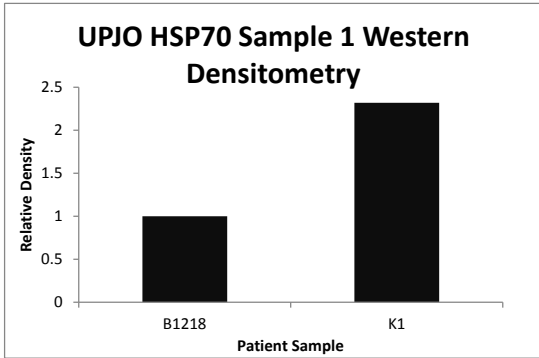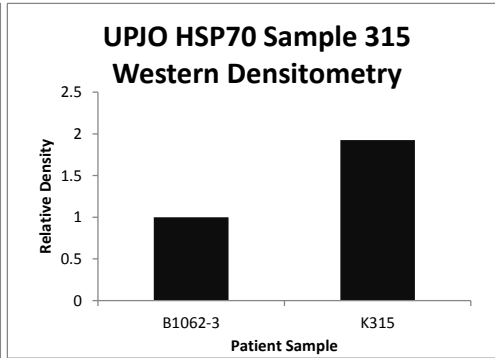

Supplement: 10.1074_M116.059386_mcp.M116.059386-5.pdf [file 10.1074_M116.059386_mcp.M116.059386-5.pdf]
