# Supplementary material
Source: PubMed Central journal article supplement (PMC4974339)
Supplement: 10.1074_M116.059386_mcp.M116.059386-3.pdf [file 10.1074_M116.059386_mcp.M116.059386-3.pdf]

| Name                                             | Gene     | BU:CU | KU:CU |
|--------------------------------------------------|----------|-------|-------|
| Glutathione S-transferase Mu 1                   | GSTM1    |       | 18.07 |
| Glutathione S-transferase Mu 4                   | GSTM4    |       | 8.33  |
| Alcohol dehydrogenase class-3                    | ADH5     |       | 8.27  |
| Junction plakoglobin                             | JUP      |       | 5.85  |
| Isoform Non-muscle of Myosin light polypeptide 6 | MYL6     |       | 5.38  |
| Complement factor H                              | CFH      |       | 5.27  |
| Dehydrogenase/reductase member 2 isoform 2       | DHRS2    |       | 5.26  |
| Keratin, type II cytoskeletal 7                  | KRT7     |       | 4.77  |
| Apolipoprotein A-I                               | APOA1    | 1.27  | 4.40  |
| Glutathione S-transferase Mu 3                   | GSTM3    |       | 4.33  |
| Alpha-2-macroglobulin                            | A2M      | 1.45  | 3.99  |
| Annexin IV                                       | ANXA4    |       | 3.80  |
| Carbonic anhydrase 1                             | CA1      |       | 3.72  |
| Fibrinogen beta chain                            | FGB      |       | 3.58  |
| Inter-alpha-trypsin inhibitor heavy chain H1     | ITIH1    |       | 3.52  |
| Hemoglobin subunit beta                          | HBB      |       | 3.45  |
| Hemoglobin subunit alpha                         | HBA1     | 1.47  | 3.36  |
| Fibrinogen gamma chain                           | FGG      |       | 3.31  |
| Complement C4-A                                  | C4A      | 1.25  | 3.19  |
| InaD-like protein                                | INADL    |       | 3.17  |
| Heparin cofactor 2                               | SERPIND1 |       | 3.13  |
| Cofilin-1                                        | CFL1     |       | 3.09  |
| Heme-binding protein 2                           | HEBP2    |       | 3.08  |
| Complement C3                                    | C3       | 1.26  | 3.01  |
| Serotransferrin                                  | TF       | 1.51  | 2.96  |
| Complement factor B                              | CFB      |       | 2.95  |
| Antithrombin-III                                 | SERPINC1 | 1.40  | 2.87  |
| Alpha-1-antitrypsin                              | SERPINA1 | 1.16  | 2.83  |
| Aldose reductase                                 | AKR1B1   |       | 2.79  |
| Complement component C9                          | C9       |       | 2.76  |
| Hemopexin                                        | HPX      | 1.45  | 2.62  |
| Ig mu chain C region                             | IGHM     | 3.27  | 2.54  |
| Fibrinogen alpha chain                           | FGA      |       | 2.47  |
| CP Ceruloplasmin                                 | CP       |       | 2.44  |
| apolipoprotein A-IV                              | APOA4    |       | 2.40  |
| Prostaglandin reductase 1                        | LTB4DH   |       | 2.33  |
| Involucrin                                       | IVL      |       | 2.28  |
| Apolipoprotein A-II                              | APOA2    |       | 2.27  |
| Heat shock protein beta-1                        | HSPB1    |       | 2.26  |
| Angiotensinogen                                  | AGT      | 1.28  | 2.21  |
| Fatty acid binding protein 1                     | FABP1    | 3.06  | 1.92  |
| Corticosteroid-binding globulin                  | SERPINA6 | 2.11  | 1.85  |
| Retinal dehydrogenase 1                          | ALDH1A1  | -1.86 | 1.81  |
| Pepsin A                                         | PGA3     | 2.07  | 1.56  |
| Heat shock 70 kDa protein 1A/1B                  | HSPA1A   | -1.44 | 1.51  |
| Protein S100-P                                   | S100P    | 1.61  | 1.48  |

|                                                         |          |       |       |
|---------------------------------------------------------|----------|-------|-------|
| Alpha-1-acid glycoprotein 1                             | ORM1     | 1.77  | 1.40  |
| Leucine-rich alpha-2-glycoprotein                       | LRG1     | 1.66  | 1.39  |
| Ganglioside GM2 activator                               | GM2A     | 1.33  | -1.32 |
| Tenascin                                                | TNC      | -1.52 | -1.59 |
| Cadherin-2                                              | CDH2     | -1.54 | -1.61 |
| Urokinase-type plasminogen activator                    | PLAU     | -1.76 | -1.84 |
| Basal cell adhesion molecule                            | BCAM     | -1.88 | -2.01 |
| WAP four-disulfide core domain protein 2                | WFDC2    | -1.60 | -2.02 |
| CD9 antigen                                             | CD9      | -1.80 | -2.05 |
| Golgi membrane protein 1                                | GOLM1    | -1.54 | -2.07 |
| Peptidase inhibitor 15                                  | PI15     | -1.80 | -2.08 |
| Glutathione peroxidase 3                                | GPX3     | -1.97 | -2.08 |
| Neurexin-1-alpha                                        | NRXN1    | -1.51 | -2.28 |
| Leukocyte elastase inhibitor                            | SERPINB1 | -3.19 | -2.31 |
| Secretogranin-1                                         | CHGB     | -1.60 | -2.41 |
| Neurexin-3-beta                                         | NRXN3    | -1.72 | -2.51 |
| Cadherin-6                                              | CDH6     | -1.78 | -2.55 |
| Vitamin K-dependent protein Z                           | PROZ     | -1.63 | -2.56 |
| Sodium/potassium-transporting ATPase subunit gamma      | FXVD2    | -1.74 | -2.56 |
| Kallikrein-1                                            | KLK1     | -2.01 | -2.89 |
| CMRF35-like molecule 8                                  | CD300A   |       | -3.33 |
| Biglycan                                                | BGN      |       | -5.79 |
| T-cell antigen CD7                                      | CD7      | -2.02 |       |
| Glucose-6-phosphate isomerase                           | GPI      | -1.84 |       |
| Plasminogen                                             | PLG      | -1.53 |       |
| L-lactate dehydrogenase B chain                         | LDHB     | -1.50 |       |
| Lymphatic vessel endothelial hyaluronic acid receptor 1 | LYVE1    | 1.62  |       |
| Keratin, type II cytoskeletal 1                         | KRT1     | 2.33  |       |
| Keratin, type II cytoskeletal 2 epidermal               | KRT2     | 2.60  |       |
| Keratin, type I cytoskeletal 10                         | KRT10    | 4.08  |       |
