# Supplementary material
Source: PubMed Central journal article supplement (PMC4974339)
Supplement: 10.1074_M116.059386_mcp.M116.059386-6.pdf [file 10.1074_M116.059386_mcp.M116.059386-6.pdf]

Mean Protein Concentrations (ug/mL) per sample type

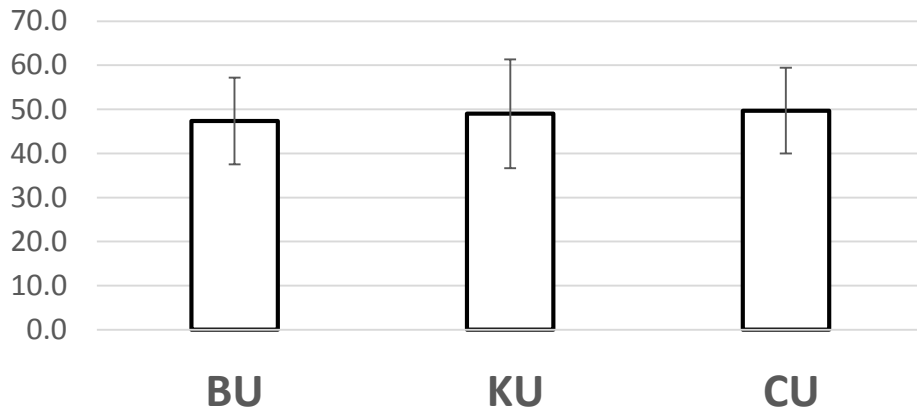

Mean Protein concentrations +/- 1 standard deviation for each cohort are shown, in units of micrograms per mL of urine. No statistically significant differences were observed.

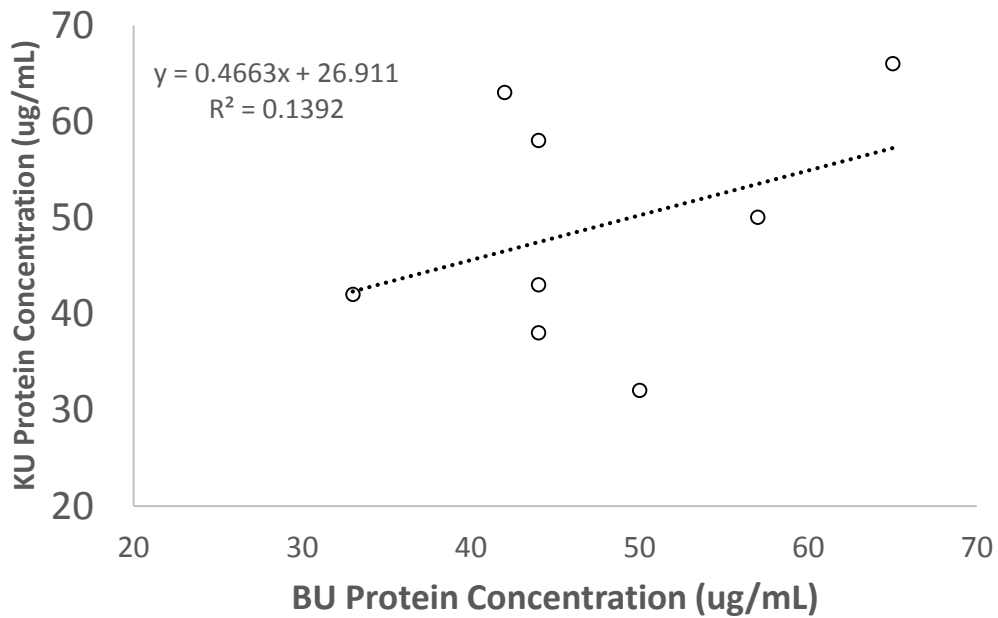

Matched KU and CU samples were plotted to evaluate any possible relationship between their protein concentrations. None was found.
