# Supplementary material
Source: PubMed Central journal article supplement (PMC4974339)

SDS-PAGE analysis of urinary proteins

BU1 KU1 CU1 BU2 KU2 CU2 BU3 KU3 CU3

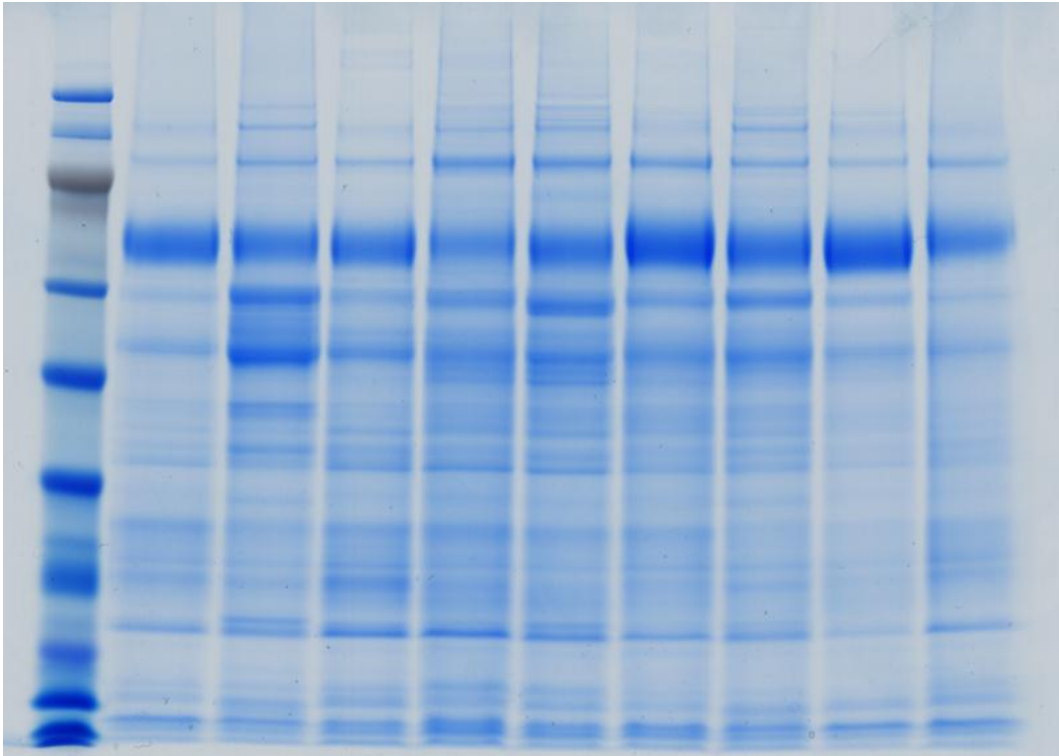

Supplement: 10.1074_M116.059386_mcp.M116.059386-1.pdf [file 10.1074_M116.059386_mcp.M116.059386-1.pdf]

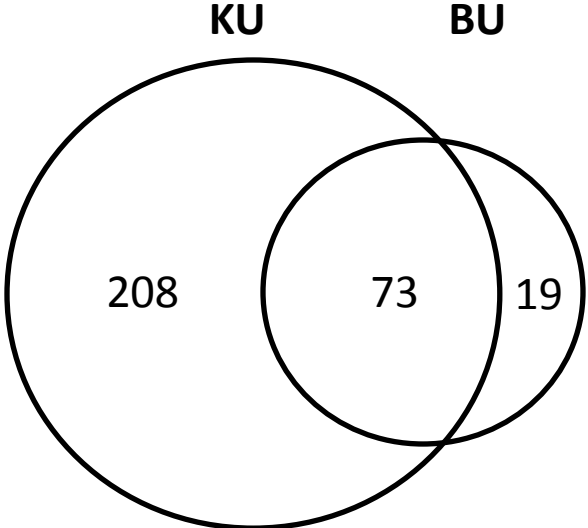

Supplement: 10.1074_M116.059386_mcp.M116.059386-2.pdf [file 10.1074_M116.059386_mcp.M116.059386-2.pdf]
